# Supplementary material for: Youth’s perception toward ecotourism as a possible model for sustainable use of local tourism resources
Source: Frontiers journal article supplement (doi:10.3389/fenvs.2022.940957), 2022-08-12
Supplement: Data_Sheet_1.pdf [file Data_Sheet_1.pdf]

Table 12. Questionnaire on ecotourism

| Questionnaire on ecotourism |                                                                                                                                               |                                             |                                        |                                                     |                                         |                                             |
|-----------------------------|-----------------------------------------------------------------------------------------------------------------------------------------------|---------------------------------------------|----------------------------------------|-----------------------------------------------------|-----------------------------------------|---------------------------------------------|
| 1.                          | Your gender is:                                                                                                                               | <input type="checkbox"/> Female             | <input type="checkbox"/> Male          |                                                     |                                         |                                             |
| 2.                          | Your age is:                                                                                                                                  | <input type="checkbox"/> 20-30              | <input type="checkbox"/> 31-40         | <input type="checkbox"/> 41-50                      | <input type="checkbox"/> Over 51        |                                             |
| 3.                          | Your address is in:                                                                                                                           | <input type="checkbox"/> Urban              | <input type="checkbox"/> Rural         |                                                     |                                         |                                             |
| 4.                          | Your home county is:                                                                                                                          | .....                                       |                                        |                                                     |                                         |                                             |
| 5.                          | Your average monthly income is:                                                                                                               | <input type="checkbox"/> Under 2500 lei     | <input type="checkbox"/> 2500-5000 lei | <input type="checkbox"/> 5001-7500 lei              | <input type="checkbox"/> 7501-10000 lei | <input type="checkbox"/> Over 10000 lei     |
| 6.                          | On a scale of 1 to 5, which of the following statements do you agree with? Ecotourism is a form of tourism that:                              |                                             |                                        |                                                     |                                         |                                             |
| •                           | It is sustainable                                                                                                                             | <input type="checkbox"/> Total disagreement | <input type="checkbox"/> Disagree      | <input type="checkbox"/> Neither agree nor disagree | <input type="checkbox"/> Agreement      | <input type="checkbox"/> Total agreement    |
| •                           | It takes place in nature                                                                                                                      | <input type="checkbox"/> Total disagreement | <input type="checkbox"/> Disagree      | <input type="checkbox"/> Neither agree nor disagree | <input type="checkbox"/> Agreement      | <input type="checkbox"/> Total agreement    |
| •                           | It takes place in protected areas                                                                                                             | <input type="checkbox"/> Total disagreement | <input type="checkbox"/> Disagree      | <input type="checkbox"/> Neither agree nor disagree | <input type="checkbox"/> Agreement      | <input type="checkbox"/> Total agreement    |
| •                           | Contributes to the support of the local community                                                                                             | <input type="checkbox"/> Total disagreement | <input type="checkbox"/> Disagree      | <input type="checkbox"/> Neither agree nor disagree | <input type="checkbox"/> Agreement      | <input type="checkbox"/> Total agreement    |
| •                           | It has a relatively minimal impact on the social and cultural environment                                                                     | <input type="checkbox"/> Total disagreement | <input type="checkbox"/> Disagree      | <input type="checkbox"/> Neither agree nor disagree | <input type="checkbox"/> Agreement      | <input type="checkbox"/> Total agreement    |
| •                           | It has an educational character and respect for nature                                                                                        | <input type="checkbox"/> Total disagreement | <input type="checkbox"/> Disagree      | <input type="checkbox"/> Neither agree nor disagree | <input type="checkbox"/> Agreement      | <input type="checkbox"/> Total agreement    |
| •                           | Contributes to the conservation of biodiversity                                                                                               | <input type="checkbox"/> Total disagreement | <input type="checkbox"/> Disagree      | <input type="checkbox"/> Neither agree nor disagree | <input type="checkbox"/> Agreement      | <input type="checkbox"/> Total agreement    |
| •                           | Stimulates local economies                                                                                                                    | <input type="checkbox"/> Total disagreement | <input type="checkbox"/> Disagree      | <input type="checkbox"/> Neither agree nor disagree | <input type="checkbox"/> Agreement      | <input type="checkbox"/> Total agreement    |
| 7.                          | On a scale of 1 to 5, what are the most important reasons why you choose an ecotourism destination? (1 - least important, 5 - most important) |                                             |                                        |                                                     |                                         |                                             |
| •                           | The popularity of the area                                                                                                                    | <input type="checkbox"/> Least important    | <input type="checkbox"/> Unimportant   | <input type="checkbox"/> Important enough           | <input type="checkbox"/> Important      | <input type="checkbox"/> The most important |
| •                           | Price/quality of services                                                                                                                     | <input type="checkbox"/> Least important    | <input type="checkbox"/> Unimportant   | <input type="checkbox"/> Important enough           | <input type="checkbox"/> Important      | <input type="checkbox"/> The most important |
| •                           | The beauty of the landscape                                                                                                                   | <input type="checkbox"/> Least important    | <input type="checkbox"/> Unimportant   | <input type="checkbox"/> Important enough           | <input type="checkbox"/> Important      | <input type="checkbox"/> The most important |
| •                           | Biodiversity                                                                                                                                  | <input type="checkbox"/> Least important    | <input type="checkbox"/> Unimportant   | <input type="checkbox"/> Important enough           | <input type="checkbox"/> Important      | <input type="checkbox"/> The most important |
| •                           | Local gastronomy                                                                                                                              | <input type="checkbox"/> Least important    | <input type="checkbox"/> Unimportant   | <input type="checkbox"/> Important enough           | <input type="checkbox"/> Important      | <input type="checkbox"/> The most important |
| •                           | The hospitality of the hosts                                                                                                                  | <input type="checkbox"/> Least important    | <input type="checkbox"/> Unimportant   | <input type="checkbox"/> Important enough           | <input type="checkbox"/> Important      | <input type="checkbox"/> The most important |
| •                           | The multitude of activities in nature                                                                                                         | <input type="checkbox"/> Least important    | <input type="checkbox"/> Unimportant   | <input type="checkbox"/> Important enough           | <input type="checkbox"/> Important      | <input type="checkbox"/> The most important |
| 8.                          | How important is the price / quality ratio of ecotourism services according to your monthly income?                                           | <input type="checkbox"/> Least important    | <input type="checkbox"/> Unimportant   | <input type="checkbox"/> Important enough           | <input type="checkbox"/> Important      | <input type="checkbox"/> The most important |
| 9.                          | What are the most interesting activities you would like to do in an ecotourism destination if you were staying in the local community?        |                                             |                                        |                                                     |                                         |                                             |
|                             | Riding                                                                                                                                        | <input type="checkbox"/> Total disagreement | <input type="checkbox"/> Disagree      | <input type="checkbox"/> Neither agree nor disagree | <input type="checkbox"/> Agreement      | <input type="checkbox"/> Total agreement    |
|                             | Fishing / hunting                                                                                                                             | <input type="checkbox"/> Total disagreement | <input type="checkbox"/> Disagree      | <input type="checkbox"/> Neither agree nor disagree | <input type="checkbox"/> Agreement      | <input type="checkbox"/> Total agreement    |
|                             | Observing the flora                                                                                                                           | <input type="checkbox"/> Total disagreement | <input type="checkbox"/> Disagree      | <input type="checkbox"/> Neither agree nor disagree | <input type="checkbox"/> Agreement      | <input type="checkbox"/> Total agreement    |
|                             | Observing the fauna                                                                                                                           | <input type="checkbox"/> Total disagreement | <input type="checkbox"/> Disagree      | <input type="checkbox"/> Neither agree nor disagree | <input type="checkbox"/> Agreement      | <input type="checkbox"/> Total agreement    |
|                             | Hiking                                                                                                                                        | <input type="checkbox"/> Total disagreement | <input type="checkbox"/> Disagree      | <input type="checkbox"/> Neither agree nor disagree | <input type="checkbox"/> Agreement      | <input type="checkbox"/> Total agreement    |
|                             | Climbing                                                                                                                                      | <input type="checkbox"/> Total disagreement | <input type="checkbox"/> Disagree      | <input type="checkbox"/> Neither agree nor disagree | <input type="checkbox"/> Agreement      | <input type="checkbox"/> Total agreement    |
|                             | Rafting / canoeing                                                                                                                            | <input type="checkbox"/> Total disagreement | <input type="checkbox"/> Disagree      | <input type="checkbox"/> Neither agree nor disagree | <input type="checkbox"/> Agreement      | <input type="checkbox"/> Total agreement    |

|     |                                                                                                                |                                             |                                         |                                                     |                                      |                                          |
|-----|----------------------------------------------------------------------------------------------------------------|---------------------------------------------|-----------------------------------------|-----------------------------------------------------|--------------------------------------|------------------------------------------|
|     | Sport activities                                                                                               | <input type="checkbox"/> Total disagreement | <input type="checkbox"/> Disagree       | <input type="checkbox"/> Neither agree nor disagree | <input type="checkbox"/> Agreement   | <input type="checkbox"/> Total agreement |
|     | Tasting of traditional products                                                                                | <input type="checkbox"/> Total disagreement | <input type="checkbox"/> Disagree       | <input type="checkbox"/> Neither agree nor disagree | <input type="checkbox"/> Agreement   | <input type="checkbox"/> Total agreement |
|     | Participation in agricultural activities                                                                       | <input type="checkbox"/> Total disagreement | <input type="checkbox"/> Disagree       | <input type="checkbox"/> Neither agree nor disagree | <input type="checkbox"/> Agreement   | <input type="checkbox"/> Total agreement |
|     | Folk evening                                                                                                   | <input type="checkbox"/> Total disagreement | <input type="checkbox"/> Disagree       | <input type="checkbox"/> Neither agree nor disagree | <input type="checkbox"/> Agreement   | <input type="checkbox"/> Total agreement |
|     | Local guided tour                                                                                              | <input type="checkbox"/> Total disagreement | <input type="checkbox"/> Disagree       | <input type="checkbox"/> Neither agree nor disagree | <input type="checkbox"/> Agreement   | <input type="checkbox"/> Total agreement |
|     | Photo tour                                                                                                     | <input type="checkbox"/> Total disagreement | <input type="checkbox"/> Disagree       | <input type="checkbox"/> Neither agree nor disagree | <input type="checkbox"/> Agreement   | <input type="checkbox"/> Total agreement |
|     | Bike ride                                                                                                      | <input type="checkbox"/> Total disagreement | <input type="checkbox"/> Disagree       | <input type="checkbox"/> Neither agree nor disagree | <input type="checkbox"/> Agreement   | <input type="checkbox"/> Total agreement |
|     | Craft demonstrations                                                                                           | <input type="checkbox"/> Total disagreement | <input type="checkbox"/> Disagree       | <input type="checkbox"/> Neither agree nor disagree | <input type="checkbox"/> Agreement   | <input type="checkbox"/> Total agreement |
|     | Attend to local events                                                                                         | <input type="checkbox"/> Total disagreement | <input type="checkbox"/> Disagree       | <input type="checkbox"/> Neither agree nor disagree | <input type="checkbox"/> Agreement   | <input type="checkbox"/> Total agreement |
| 10. | How important are the following criteria in your decision to spend your vacation in an ecotourism destination? |                                             |                                         |                                                     |                                      |                                          |
|     | Tourist programs                                                                                               | <input type="checkbox"/> Unimportant        | <input type="checkbox"/> Less important | <input type="checkbox"/> Indifferent                | <input type="checkbox"/> Important   | <input type="checkbox"/> Very important  |
|     | Accommodation                                                                                                  | <input type="checkbox"/> Unimportant        | <input type="checkbox"/> Less important | <input type="checkbox"/> Indifferent                | <input type="checkbox"/> Important   | <input type="checkbox"/> Very important  |
|     | Food                                                                                                           | <input type="checkbox"/> Unimportant        | <input type="checkbox"/> Less important | <input type="checkbox"/> Indifferent                | <input type="checkbox"/> Important   | <input type="checkbox"/> Very important  |
|     | Local products                                                                                                 | <input type="checkbox"/> Unimportant        | <input type="checkbox"/> Less important | <input type="checkbox"/> Indifferent                | <input type="checkbox"/> Important   | <input type="checkbox"/> Very important  |
|     | Recreational activities                                                                                        | <input type="checkbox"/> Unimportant        | <input type="checkbox"/> Less important | <input type="checkbox"/> Indifferent                | <input type="checkbox"/> Important   | <input type="checkbox"/> Very important  |
| 11. | In your opinion, what are the most well-known ecotourism destinations in Romania?                              |                                             |                                         |                                                     |                                      |                                          |
|     | Transilvania Hills                                                                                             | <input type="checkbox"/> The least known    | <input type="checkbox"/> Little known   | <input type="checkbox"/> Known                      | <input type="checkbox"/> Very famous | <input type="checkbox"/> The most known  |
|     | Eco Maramureș                                                                                                  | <input type="checkbox"/> The least known    | <input type="checkbox"/> Little known   | <input type="checkbox"/> Known                      | <input type="checkbox"/> Very famous | <input type="checkbox"/> The most known  |
|     | Hațeg Land - Retezat                                                                                           | <input type="checkbox"/> The least known    | <input type="checkbox"/> Little known   | <input type="checkbox"/> Known                      | <input type="checkbox"/> Very famous | <input type="checkbox"/> The most known  |
|     | Dorna Land                                                                                                     | <input type="checkbox"/> The least known    | <input type="checkbox"/> Little known   | <input type="checkbox"/> Known                      | <input type="checkbox"/> Very famous | <input type="checkbox"/> The most known  |
|     | Zărnești- The forest of the king                                                                               | <input type="checkbox"/> The least known    | <input type="checkbox"/> Little known   | <input type="checkbox"/> Known                      | <input type="checkbox"/> Very famous | <input type="checkbox"/> The most known  |
|     | Tușnad Bath and surroundings                                                                                   | <input type="checkbox"/> The least known    | <input type="checkbox"/> Little known   | <input type="checkbox"/> Known                      | <input type="checkbox"/> Very famous | <input type="checkbox"/> The most known  |
|     | Danube Delta                                                                                                   | <input type="checkbox"/> The least known    | <input type="checkbox"/> Little known   | <input type="checkbox"/> Known                      | <input type="checkbox"/> Very famous | <input type="checkbox"/> The most known  |
|     | Mărginimea Sibiului                                                                                            | <input type="checkbox"/> The least known    | <input type="checkbox"/> Little known   | <input type="checkbox"/> Known                      | <input type="checkbox"/> Very famous | <input type="checkbox"/> The most known  |
|     | Bison Land - Vânători Neamț                                                                                    | <input type="checkbox"/> The least known    | <input type="checkbox"/> Little known   | <input type="checkbox"/> Known                      | <input type="checkbox"/> Very famous | <input type="checkbox"/> The most known  |
|     | Nera Gorge                                                                                                     | <input type="checkbox"/> The least known    | <input type="checkbox"/> Little known   | <input type="checkbox"/> Known                      | <input type="checkbox"/> Very famous | <input type="checkbox"/> The most known  |
| 12. | Have you visited the following ecotourism / rural tourism destinations in Sibiu County in the last two years?  |                                             |                                         |                                                     |                                      |                                          |
|     | Mărginimea Sibiului                                                                                            | <input type="checkbox"/> Yes                | <input type="checkbox"/> No             |                                                     |                                      |                                          |
|     | The Făgăraș Natural Park                                                                                       | <input type="checkbox"/> Yes                | <input type="checkbox"/> No             |                                                     |                                      |                                          |
|     | The Lake Bălea and Bălea Waterfall                                                                             | <input type="checkbox"/> Yes                | <input type="checkbox"/> No             |                                                     |                                      |                                          |
|     | Podragu Lake                                                                                                   | <input type="checkbox"/> Yes                | <input type="checkbox"/> No             |                                                     |                                      |                                          |
|     | Avrig lake                                                                                                     | <input type="checkbox"/> Yes                | <input type="checkbox"/> No             |                                                     |                                      |                                          |
|     | Trasfăgărășanul                                                                                                | <input type="checkbox"/> Yes                | <input type="checkbox"/> No             |                                                     |                                      |                                          |
|     | Transalpina                                                                                                    | <input type="checkbox"/> Yes                | <input type="checkbox"/> No             |                                                     |                                      |                                          |
|     | Păltiniș Resort                                                                                                | <input type="checkbox"/> Yes                | <input type="checkbox"/> No             |                                                     |                                      |                                          |
|     | Biertan                                                                                                        | <input type="checkbox"/> Yes                | <input type="checkbox"/> No             |                                                     |                                      |                                          |
|     | Cisnădioara                                                                                                    | <input type="checkbox"/> Yes                | <input type="checkbox"/> No             |                                                     |                                      |                                          |
|     | Oca Sibiului                                                                                                   | <input type="checkbox"/> Yes                | <input type="checkbox"/> No             |                                                     |                                      |                                          |
|     | Clay Castle from the Fairy Valley                                                                              | <input type="checkbox"/> Yes                | <input type="checkbox"/> No             |                                                     |                                      |                                          |
| 13. | The frequency of visiting in the last 2 years the ecotourism destinations in Sibiu County was:                 |                                             |                                         |                                                     |                                      |                                          |

|     |                                                                                                                                                   |                                             |                                            |                                                     |                                       |                                          |
|-----|---------------------------------------------------------------------------------------------------------------------------------------------------|---------------------------------------------|--------------------------------------------|-----------------------------------------------------|---------------------------------------|------------------------------------------|
|     | Mărginimea Sibiului                                                                                                                               | <input type="checkbox"/> Never              | <input type="checkbox"/> Between 1-3 times | <input type="checkbox"/> Between 3-5 times          | <input type="checkbox"/> Over 5 times |                                          |
|     | The Făgăraș Natural Park                                                                                                                          | <input type="checkbox"/> Never              | <input type="checkbox"/> Between 1-3 times | <input type="checkbox"/> Between 3-5 times          | <input type="checkbox"/> Over 5 times |                                          |
|     | The Lake Bălea and Bălea Waterfall                                                                                                                | <input type="checkbox"/> Never              | <input type="checkbox"/> Between 1-3 times | <input type="checkbox"/> Between 3-5 times          | <input type="checkbox"/> Over 5 times |                                          |
|     | Podragu Lake                                                                                                                                      | <input type="checkbox"/> Never              | <input type="checkbox"/> Between 1-3 times | <input type="checkbox"/> Between 3-5 times          | <input type="checkbox"/> Over 5 times |                                          |
|     | Avrig lake                                                                                                                                        | <input type="checkbox"/> Never              | <input type="checkbox"/> Between 1-3 times | <input type="checkbox"/> Between 3-5 times          | <input type="checkbox"/> Over 5 times |                                          |
|     | Trasfăgărășanul                                                                                                                                   | <input type="checkbox"/> Never              | <input type="checkbox"/> Between 1-3 times | <input type="checkbox"/> Between 3-5 times          | <input type="checkbox"/> Over 5 times |                                          |
|     | Transalpina                                                                                                                                       | <input type="checkbox"/> Never              | <input type="checkbox"/> Between 1-3 times | <input type="checkbox"/> Between 3-5 times          | <input type="checkbox"/> Over 5 times |                                          |
|     | Păltiniș Resort                                                                                                                                   | <input type="checkbox"/> Never              | <input type="checkbox"/> Between 1-3 times | <input type="checkbox"/> Between 3-5 times          | <input type="checkbox"/> Over 5 times |                                          |
|     | Biertan                                                                                                                                           | <input type="checkbox"/> Never              | <input type="checkbox"/> Between 1-3 times | <input type="checkbox"/> Between 3-5 times          | <input type="checkbox"/> Over 5 times |                                          |
|     | Cisnădioara                                                                                                                                       | <input type="checkbox"/> Never              | <input type="checkbox"/> Between 1-3 times | <input type="checkbox"/> Between 3-5 times          | <input type="checkbox"/> Over 5 times |                                          |
|     | Ocna Sibiului                                                                                                                                     | <input type="checkbox"/> Never              | <input type="checkbox"/> Between 1-3 times | <input type="checkbox"/> Between 3-5 times          | <input type="checkbox"/> Over 5 times |                                          |
|     | Clay Castle from the Fairy Valley                                                                                                                 | <input type="checkbox"/> Never              | <input type="checkbox"/> Between 1-3 times | <input type="checkbox"/> Between 3-5 times          | <input type="checkbox"/> Over 5 times |                                          |
| 14. | The duration of the last vacation spent in ecotourism destinations was:                                                                           |                                             |                                            |                                                     |                                       |                                          |
|     | Between 1-3 days                                                                                                                                  | <input type="checkbox"/> Yes                | <input type="checkbox"/> No                |                                                     |                                       |                                          |
|     | Between 3-7 days                                                                                                                                  | <input type="checkbox"/> Yes                | <input type="checkbox"/> No                |                                                     |                                       |                                          |
|     | Between 7-14 days                                                                                                                                 | <input type="checkbox"/> Yes                | <input type="checkbox"/> No                |                                                     |                                       |                                          |
|     | More than 14 days                                                                                                                                 | <input type="checkbox"/> Yes                | <input type="checkbox"/> No                |                                                     |                                       |                                          |
| 15. | What was your means of transportation during your last holiday in ecotourism destinations?                                                        |                                             |                                            |                                                     |                                       |                                          |
|     | Car                                                                                                                                               | <input type="checkbox"/> Yes                | <input type="checkbox"/> No                |                                                     |                                       |                                          |
|     | Minibus                                                                                                                                           | <input type="checkbox"/> Yes                | <input type="checkbox"/> No                |                                                     |                                       |                                          |
|     | Bus                                                                                                                                               | <input type="checkbox"/> Yes                | <input type="checkbox"/> No                |                                                     |                                       |                                          |
|     | Train                                                                                                                                             | <input type="checkbox"/> Yes                | <input type="checkbox"/> No                |                                                     |                                       |                                          |
|     | Bicycle                                                                                                                                           | <input type="checkbox"/> Yes                | <input type="checkbox"/> No                |                                                     |                                       |                                          |
| 16. | Which of the following statements do you agree with? Computerization helps us in planning and conducting holidays in ecotourism destinations for: |                                             |                                            |                                                     |                                       |                                          |
|     | For searching for holiday offers                                                                                                                  | <input type="checkbox"/> Total disagreement | <input type="checkbox"/> Disagree          | <input type="checkbox"/> Neither agree nor disagree | <input type="checkbox"/> Agreement    | <input type="checkbox"/> Total agreement |
|     | For booking travel tickets                                                                                                                        | <input type="checkbox"/> Total disagreement | <input type="checkbox"/> Disagree          | <input type="checkbox"/> Neither agree nor disagree | <input type="checkbox"/> Agreement    | <input type="checkbox"/> Total agreement |
|     | For booking accommodation                                                                                                                         | <input type="checkbox"/> Total disagreement | <input type="checkbox"/> Disagree          | <input type="checkbox"/> Neither agree nor disagree | <input type="checkbox"/> Agreement    | <input type="checkbox"/> Total agreement |
|     | To find out the weather forecast                                                                                                                  | <input type="checkbox"/> Total disagreement | <input type="checkbox"/> Disagree          | <input type="checkbox"/> Neither agree nor disagree | <input type="checkbox"/> Agreement    | <input type="checkbox"/> Total agreement |
|     | For the purchase of access tickets to tourist attractions                                                                                         | <input type="checkbox"/> Total disagreement | <input type="checkbox"/> Disagree          | <input type="checkbox"/> Neither agree nor disagree | <input type="checkbox"/> Agreement    | <input type="checkbox"/> Total agreement |
|     | For awarding qualifications for the tourist services provided                                                                                     | <input type="checkbox"/> Total disagreement | <input type="checkbox"/> Disagree          | <input type="checkbox"/> Neither agree nor disagree | <input type="checkbox"/> Agreement    | <input type="checkbox"/> Total agreement |
| 17. | Which of the following mobile apps did you use during your outdoor vacation?                                                                      |                                             |                                            |                                                     |                                       |                                          |
|     | ExpMapy. cz (Digital maps)                                                                                                                        | <input type="checkbox"/> Never              | <input type="checkbox"/> Rarely            | <input type="checkbox"/> Rare                       | <input type="checkbox"/> Frequently   | <input type="checkbox"/> Always          |
|     | PeakFinder (Identifies Mountain peaks)                                                                                                            | <input type="checkbox"/> Never              | <input type="checkbox"/> Rarely            | <input type="checkbox"/> Rare                       | <input type="checkbox"/> Frequently   | <input type="checkbox"/> Always          |
|     | Star Walk 2 (Identify the elements in the sky)                                                                                                    | <input type="checkbox"/> Never              | <input type="checkbox"/> Rarely            | <input type="checkbox"/> Rare                       | <input type="checkbox"/> Frequently   | <input type="checkbox"/> Always          |
|     | PlantNet (Identify the plants)                                                                                                                    | <input type="checkbox"/> Never              | <input type="checkbox"/> Rarely            | <input type="checkbox"/> Rare                       | <input type="checkbox"/> Frequently   | <input type="checkbox"/> Always          |
|     | iTrackWildlife (Identify the animals by traces)                                                                                                   | <input type="checkbox"/> Never              | <input type="checkbox"/> Rarely            | <input type="checkbox"/> Rare                       | <input type="checkbox"/> Frequently   | <input type="checkbox"/> Always          |
|     | Merlin BirdID (Identify the birds)                                                                                                                | <input type="checkbox"/> Never              | <input type="checkbox"/> Rarely            | <input type="checkbox"/> Rare                       | <input type="checkbox"/> Frequently   | <input type="checkbox"/> Always          |
|     | Field Guides to Clouds (Identify the types of clouds)                                                                                             | <input type="checkbox"/> Never              | <input type="checkbox"/> Rarely            | <input type="checkbox"/> Rare                       | <input type="checkbox"/> Frequently   | <input type="checkbox"/> Always          |

|     |                                                                       |                                             |                                   |                                                     |                                     |                                          |
|-----|-----------------------------------------------------------------------|---------------------------------------------|-----------------------------------|-----------------------------------------------------|-------------------------------------|------------------------------------------|
|     | My Lightning Traker<br>(Identify lightning within a radius of 60 km)  | <input type="checkbox"/> Never              | <input type="checkbox"/> Rarely   | <input type="checkbox"/> Rare                       | <input type="checkbox"/> Frequently | <input type="checkbox"/> Always          |
|     | Offline Survival Manual                                               | <input type="checkbox"/> Never              | <input type="checkbox"/> Rarely   | <input type="checkbox"/> Rare                       | <input type="checkbox"/> Frequently | <input type="checkbox"/> Always          |
|     | Salvamont                                                             | <input type="checkbox"/> Never              | <input type="checkbox"/> Rarely   | <input type="checkbox"/> Rare                       | <input type="checkbox"/> Frequently | <input type="checkbox"/> Always          |
| 18. | How do you find out about spending time in an ecotourism destination? |                                             |                                   |                                                     |                                     |                                          |
|     | Internet                                                              | <input type="checkbox"/> Total disagreement | <input type="checkbox"/> Disagree | <input type="checkbox"/> Neither agree nor disagree | <input type="checkbox"/> Agreement  | <input type="checkbox"/> Total agreement |
|     | Relatives and friends                                                 | <input type="checkbox"/> Total disagreement | <input type="checkbox"/> Disagree | <input type="checkbox"/> Neither agree nor disagree | <input type="checkbox"/> Agreement  | <input type="checkbox"/> Total agreement |
|     | Documentaries                                                         | <input type="checkbox"/> Total disagreement | <input type="checkbox"/> Disagree | <input type="checkbox"/> Neither agree nor disagree | <input type="checkbox"/> Agreement  | <input type="checkbox"/> Total agreement |
|     | Radio TV shows                                                        | <input type="checkbox"/> Total disagreement | <input type="checkbox"/> Disagree | <input type="checkbox"/> Neither agree nor disagree | <input type="checkbox"/> Agreement  | <input type="checkbox"/> Total agreement |
|     | Tourism agencies                                                      | <input type="checkbox"/> Total disagreement | <input type="checkbox"/> Disagree | <input type="checkbox"/> Neither agree nor disagree | <input type="checkbox"/> Agreement  | <input type="checkbox"/> Total agreement |
|     | Leaflets and brochures                                                | <input type="checkbox"/> Total disagreement | <input type="checkbox"/> Disagree | <input type="checkbox"/> Neither agree nor disagree | <input type="checkbox"/> Agreement  | <input type="checkbox"/> Total agreement |
|     | Newspapers and magazines                                              | <input type="checkbox"/> Total disagreement | <input type="checkbox"/> Disagree | <input type="checkbox"/> Neither agree nor disagree | <input type="checkbox"/> Agreement  | <input type="checkbox"/> Total agreement |
